# Supplementary material
Source: Research Square preprint supplement (doi:10.21203/rs.3.rs-8928811/v1)
Supplement: Supplementary file 1 [file 32977be0707a992649c9d8da.docx]

Supplementary Tables:

Table S1. LOD by variant. Imputation was performed using LOD/2.

| Variant | LOD |
| --- | --- |
| Wuhan | 225.000 |
| Alpha | 137.500 |
| Beta | 78.125 |
| Delta | 125.000 |
| Omicron BA.1 | 18.438 |
| Omicron BA.2 | 37.500 |
| Omicron BA.2.12.1 | 34.400 |
| Omicron BA.2.75 | 17.812 |
| Omicron BA.5 | 34.750 |

Table S2 GM Fold changes and 95% confidence intervals of MSD binding at Visit 1

| Comparison | GM Fold Change | Lower | Upper |
| --- | --- | --- | --- |
| Seropositive/Seronegative | 15.65 | 10.13 | 24.18 |
| Ancestral/Omicron | 3.69 | 3.53 | 3.86 |

Table S3 Visit 2 Comparison GM Fold Change of MSD Binding by Variant, Serostatus, and Platform

| Comparison | Group | GM Fold Change | Group | GM Fold Change |
| --- | --- | --- | --- | --- |
| mRNA/adenovirus | Ancestral Seronegative | 6.93 [3.08,15.60] | Omicron Seronegative | 7.57 [3.37,17.03] |
| mRNA/adenovirus | Ancestral Seropositive | 2.00 [0.89,4.50] | Omicron Seropositive | 2.18 [0.97,4.91] |
| mRNA/inactivated virus | Ancestral Seronegative | 14.49 [6.44,32.62] | Omicron Seronegative | 14.33 [6.37,32.24] |
| mRNA/inactivated virus | Ancestral Seropositive | 4.96 [2.20,11.16] | Omicron Seropositive | 4.91 [2.18,11.04] |
| adenovirus/inactivated virus | Ancestral Seronegative | 2.09 [0.93,4.71] | Omicron Seronegative | 1.89 [0.84,4.26] |
| adenovirus/inactivated virus | Ancestral Seropositive | 2.48 [1.10,5.58] | Omicron Seropositive | 2.25 [1.00,5.05] |
| Seropositive/Seronegative | mRNA Ancestral | 0.58 [0.26,1.3] | mRNA Omicron | 0.58 [0.26,1.31] |
| Seropositive/Seronegative | adenovirus Ancestral | 2.01 [0.89,4.51] | adenovirus Omicron | 2.02 [0.9,4.54] |
| Seropositive/Seronegative | inactivated virus Ancestral | 1.69 [0.75,3.8] | inactivated virus Omicron | 1.7 [0.76,3.83] |
| Ancestral/Omicron | mRNA Seronegative | 3.59 [3.34,3.86] | mRNA Seropositive | 3.56 [3.32,3.83] |
| Ancestral/Omicron | adenovirus Seronegative | 3.92 [3.65,4.21] | adenovirus Seropositive | 3.89 [3.62,4.18] |
| Ancestral/Omicron | inactivated virus Seronegative | 3.55 [3.3,3.81] | inactivated virus Seropositive | 3.52 [3.28,3.79] |

Table S4 Visit 2/Visit 1 GM Fold Change of MSD Binding by Variant, Serostatus, and Platform

| Group | GM Fold change V2/V1 [95% CI] |
| --- | --- |
| mRNA ancestral seronegative | 148.88 [73.66,300.95] |
| mRNA ancestral seropositive | 8.13 [4.02,16.44] |
| mRNA Omicron seronegative | 152.08 [75.27,307.29] |
| mRNA Omicron seropositive | 7.92 [3.92,16] |
| Adenovirus ancestral seronegative | 24.79 [12.26,50.11] |
| Adenovirus ancestral seropositive | 2.83 [1.4,5.73] |
| Adenovirus Omicron seronegative | 25.92 [12.83,52.37] |
| Adenovirus Omicron seropositive | 2.83 [1.4,5.71] |
| Inactivated ancestral seronegative | 17.36 [8.59,35.1] |
| Inactivated ancestral seropositive | 1.56 [0.77,3.16] |
| Inactivated Omicron seronegative | 17.75 [8.78,35.85] |
| Inactivated Omicron seropositive | 1.52 [0.75,3.07] |
